# Supplementary material for: Bioactive Ag(i) coordination complexes as dopants for castor oil plasticized ethylcellulose films
Source: Royal Society of Chemistry journal article supplement (doi:10.1039/d4dt02201g), 2024-01-01
Supplement: d4dt02201g1.pdf [file d4dt02201g1.pdf]

## Bioactive Ag(I) coordination complexes as dopants for castor oil plasticized ethylcellulose films

Francesca Scarpelli,<sup>a</sup> Alessandra Crispini,<sup>\*a</sup> Iolinda Aiello,<sup>\*a</sup> Nicolas Godbert,<sup>a</sup> Fabio Marchetti,<sup>\*b</sup> Sonila Xhafa,<sup>b</sup> Giovanni De Filpo,<sup>c</sup> Mariafrancesca Baratta,<sup>c</sup> Riccardo Berardi,<sup>d</sup> Pasquale Alfano<sup>d</sup> and Eugenia Giorno<sup>a</sup>

### Table of contents:

**Figure S1.** Comparison between the PXRD patterns calculated from single crystal data and those measured on powder samples for complexes **1** and **2**.

**Figure S2.** DSC traces of EC1a-P4, EC2a-P4, EC3a-P4, EC-4a and ECAgNO<sub>3</sub>a-P4 (black line).

**Figure S3.** PXRD pattern of AgNO<sub>3</sub>, EC0, ECAgNO<sub>3</sub>a, EC-P4, ECAgNO<sub>3</sub>a-P4.

**Figure S4.** PXRD patterns of complex **1**, EC1a, EC1a-P4, complex **2**, EC2a, EC2a-P4, complex **3**, EC3a, EC3a-P4, complex **4**, EC4a and EC4a-P4.

**Table S1.** Summary of crystal data and structure refinement for complexes **1** and **2**.

**Table S2.** Mechanical properties of ECnx-P4 films.

**Table S3.** Antibacterial activity of the ECnx-P4 as relative killing percentage (%), according to ISO standard.

**Table S4.** Antibacterial activity of the ECnx as relative killing percentage (%), according to ISO standard.

**Table S5.** Specific Ag(I) migration from ECnx square films.

**Table S6.** Specific Ag(I) migration from ECnx-P4 square films.

**Table S7.** Specific Ag(I) migration from ECnx square films.

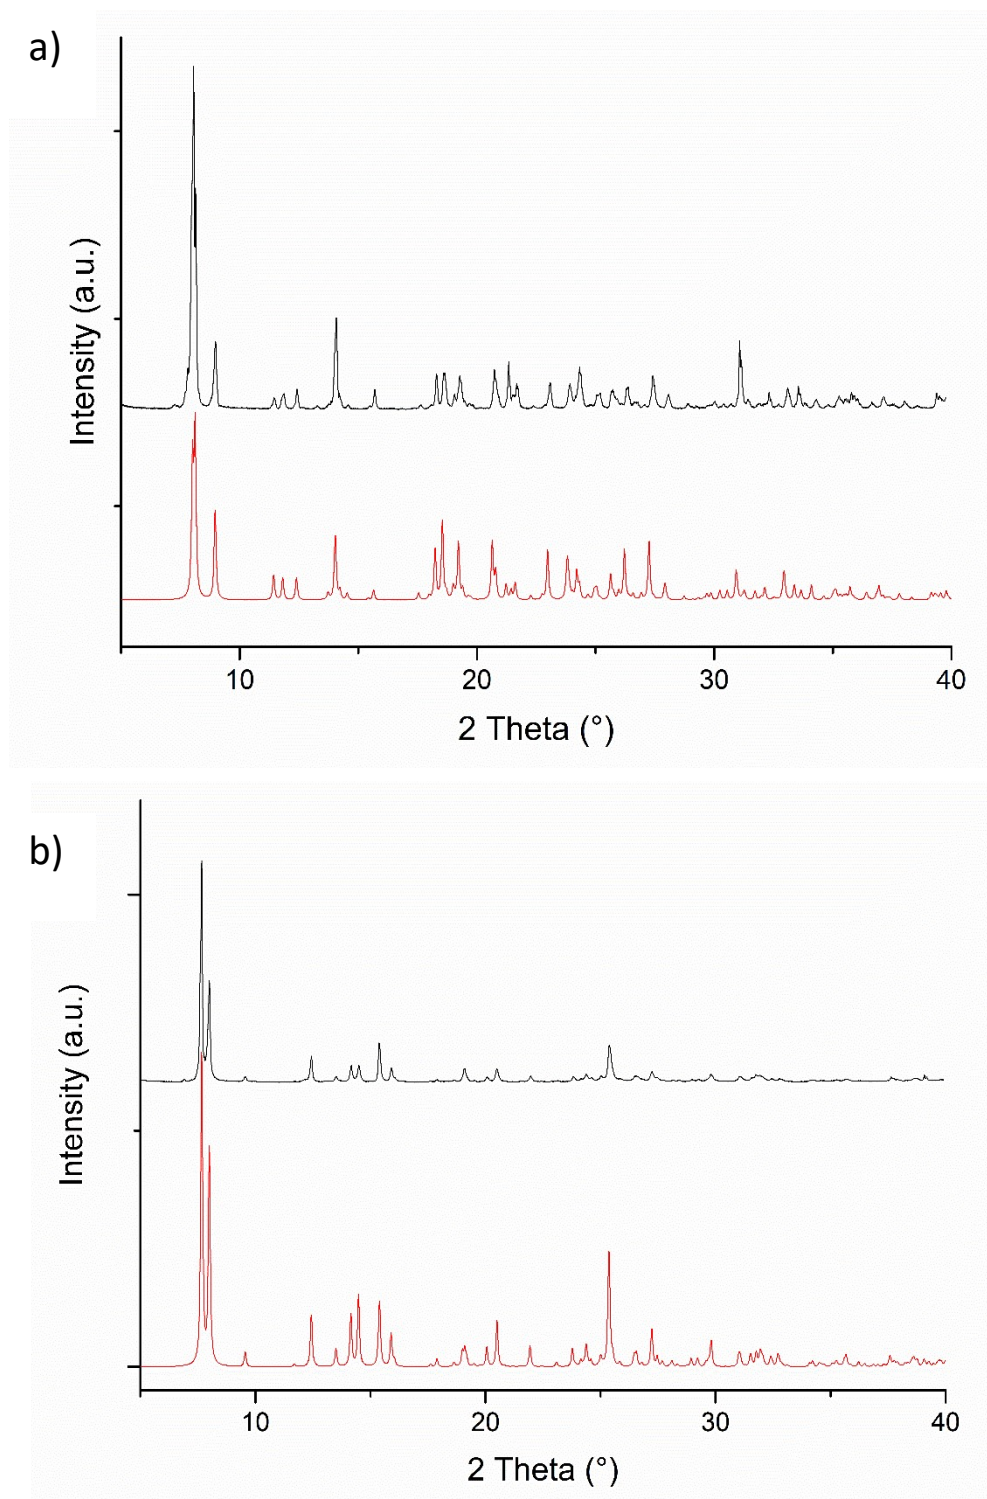

**Figure S1.** Comparison between the PXR D patterns calculated from single crystal data (red lines) and those measured on powder samples (black lines) for complex **1** (a) and complex **2** (b).

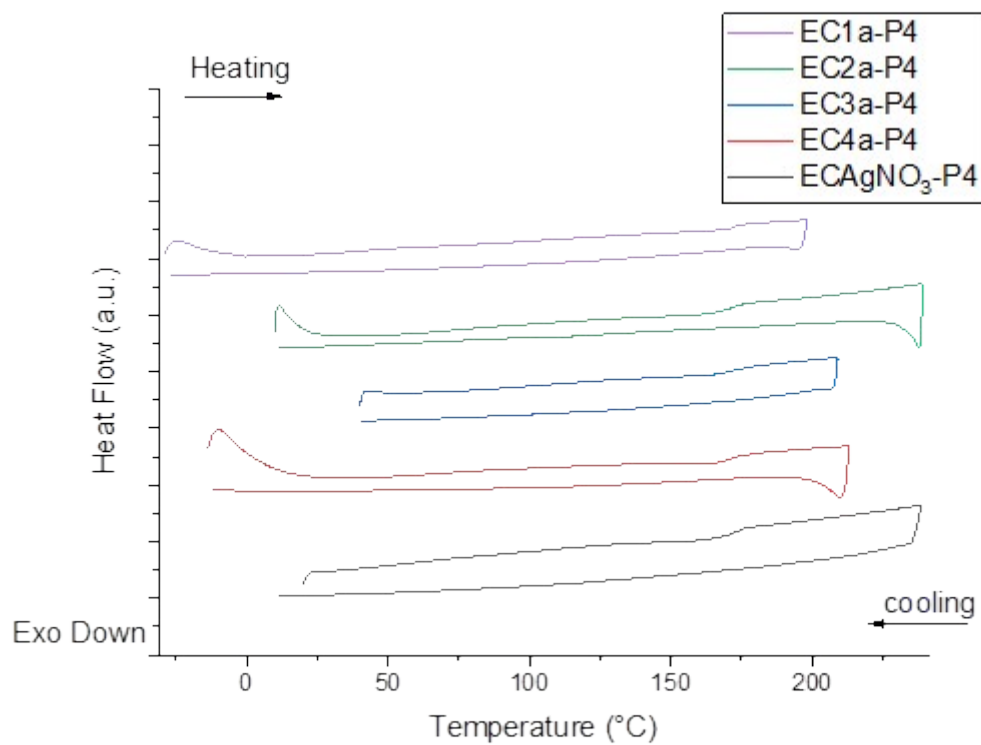

**Figure S2.** DSC traces of EC1a-P4 (violet line), EC2a-P4 (green line), EC3a-P4 (blue line), EC-4a (red line) and ECAgNO<sub>3</sub>a-P4 (black line) obtained at a heating rate of 5°C/ min.

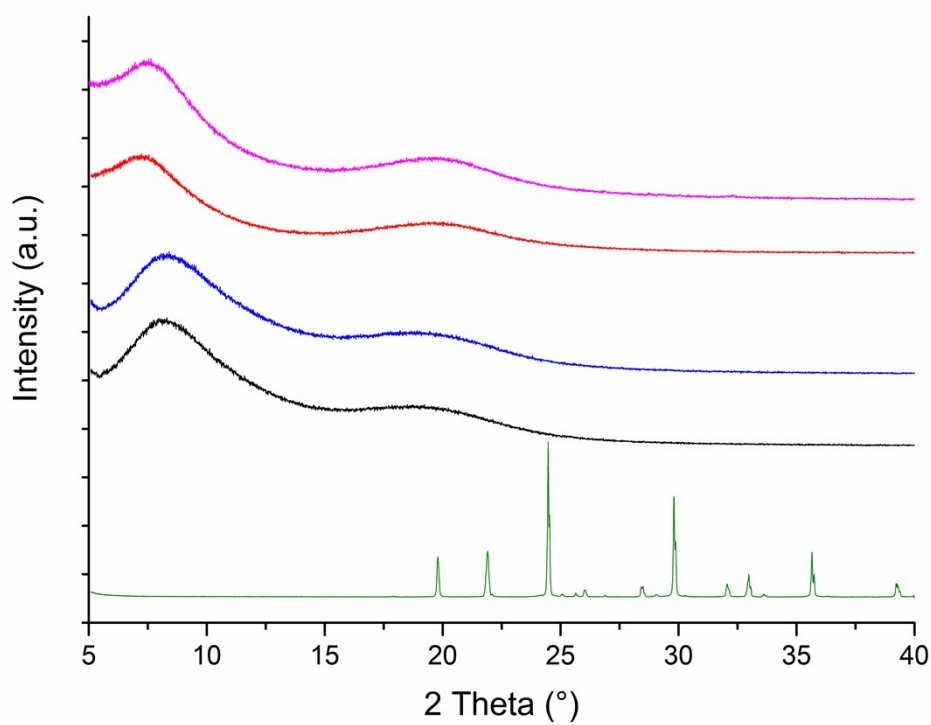

**Figure S3.** PXRD pattern of AgNO<sub>3</sub> (green line), EC0 (black line), ECAgNO<sub>3</sub>a (blue line), EC-P4 (red line), ECAgNO<sub>3</sub>a-P4 (pink line).

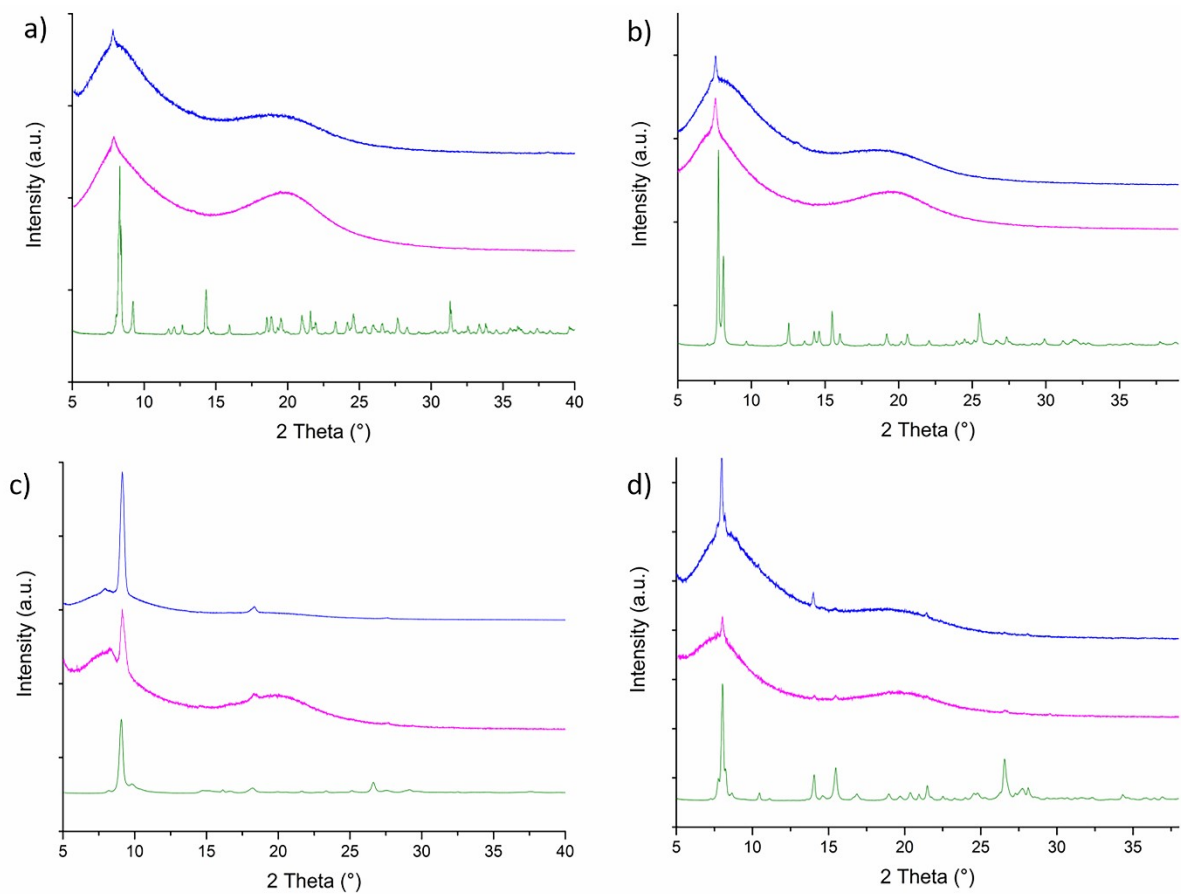

**Figure S4.** PXRD patterns of a) complex **1**, EC1a, and EC1a-P4; b) complex **2**, EC2a and EC2a-P4; c) complex **3**, EC3a and EC3a-P4; d) complex **4**, EC4a and EC4a-P4. In all patterns: complexes: green lines; ECn-P4 and ECn: pink and blue lines.

**Table S1.** Summary of crystal data and structure refinement for complexes **1** and **2**.

|                                                          | <b>1</b>                                                                        | <b>2</b>                                                                        |
|----------------------------------------------------------|---------------------------------------------------------------------------------|---------------------------------------------------------------------------------|
| Formula                                                  | C <sub>21</sub> H <sub>17</sub> F <sub>3</sub> N <sub>5</sub> O <sub>2</sub> Ag | C <sub>18</sub> H <sub>19</sub> F <sub>3</sub> N <sub>5</sub> O <sub>2</sub> Ag |
| <i>F<sub>w</sub></i> / g mol <sup>-1</sup>               | 536.27                                                                          | 839.06                                                                          |
| <i>T</i> /K                                              | 298                                                                             | 298                                                                             |
| Crystal system                                           | Monoclinic                                                                      | Triclinic                                                                       |
| Space group                                              | <i>C2/c</i>                                                                     | <i>P</i> -1                                                                     |
| <i>a</i> /Å                                              | 25.799(5)                                                                       | 7.7583(10)                                                                      |
| <i>b</i> /Å                                              | 12.7842(17)                                                                     | 11.6991(15)                                                                     |
| <i>c</i> /Å                                              | 15.510(4)                                                                       | 11.9243(15)                                                                     |
| <i>α</i> /°                                              |                                                                                 | 104.268(6)                                                                      |
| <i>β</i> /°                                              | 122.528(14)                                                                     | 91.117(6)                                                                       |
| <i>γ</i> /°                                              |                                                                                 | 102.264(6)                                                                      |
| <i>V</i> /Å <sup>3</sup>                                 | 4313.0(15)                                                                      | 1022.0(2)                                                                       |
| <i>Z</i>                                                 | 8                                                                               | 2                                                                               |
| <i>D<sub>c</sub></i> /g cm <sup>-3</sup>                 | 1.652                                                                           | 1.632                                                                           |
| <i>F</i> (000)                                           | 2144                                                                            | 504                                                                             |
| <i>μ</i> (Mo-Kα)/mm <sup>-1</sup>                        | 0.989                                                                           | 1.036                                                                           |
| Refl. Collected                                          | 86714                                                                           | 43304                                                                           |
| Refl. Indep. [ <i>R</i> int]                             | 4112 [0.0285]                                                                   | 4031 [0.0400]                                                                   |
| Reflec. Obs. [ <i>I</i> >2σ( <i>I</i> )]                 | 3638                                                                            | 3089                                                                            |
| Restraints/parameters                                    | 0 / 290                                                                         | 0 / 264                                                                         |
| <i>G</i> OO <i>F</i>                                     | 1.070                                                                           | 1.001                                                                           |
| <i>R</i> <sub>1</sub> [ <i>I</i> >2σ( <i>I</i> )] (all)  | 0.0280 (0.0702)                                                                 | 0.0320 (0.0749)                                                                 |
| <i>wR</i> <sub>2</sub> [ <i>I</i> >2σ( <i>I</i> )] (all) | 0.0328 (0.0746)                                                                 | 0.0499 (0.0843)                                                                 |
| Largest diff. peak/hole<br>/eÅ <sup>-3</sup>             | 0.534, -0.899                                                                   | 0.408, -0.322                                                                   |

**Table S2.** Mechanical properties of ECnx-P4 films.

| Sample                   | Young Modulus (MPa) | Elongation at break (%) | Stress (MPa) |
|--------------------------|---------------------|-------------------------|--------------|
| EC-P4                    | 180 ± 8             | 18,6 ± 0,7              | 8,9 ± 0,5    |
| EC1a-P4                  | 292 ± 9             | 3,2 ± 0,1               | 6,9 ± 1,7    |
| EC1b-P4                  | 263 ± 10            | 4,8 ± 0,2               | 8,0 ± 0,9    |
| EC1c-P4                  | 418 ± 13            | 3,3 ± 0,1               | 13,3 ± 1,5   |
| EC2a-P4                  | 640 ± 20            | 4,0 ± 0,2               | 16,4 ± 1,5   |
| EC2b-P4                  | 418 ± 14            | 21,0 ± 0,8              | 18,0 ± 1,6   |
| EC2c-P4                  | 230 ± 9             | 20,0 ± 0,7              | 11,1 ± 0,8   |
| EC3a-P4                  | 537 ± 18            | 7,0 ± 0,3               | 16,0 ± 1,9   |
| EC3b-P4                  | 482 ± 15            | 8,0 ± 0,3               | 13,0 ± 1,5   |
| EC3c-P4                  | 367 ± 10            | 6,7 ± 0,4               | 9,4 ± 0,9    |
| EC4a-P4                  | 481 ± 17            | 6,9 ± 0,3               | 13,7 ± 1,4   |
| EC4b-P4                  | 474 ± 13            | 8,0 ± 0,1               | 13,8 ± 1,8   |
| EC4c-P4                  | 594 ± 19            | 10,1 ± 0,2              | 17,5 ± 1,3   |
| ECAgNO <sub>3</sub> a-P4 | 303 ± 10            | 16,5 ± 0,6              | 13,6 ± 0,8   |
| ECAgNO <sub>3</sub> b-P4 | 229 ± 11            | 11,0 ± 0,4              | 10,2 ± 1,2   |
| ECAgNO <sub>3</sub> c-P4 | 198 ± 11            | 5,1 ± 0,2               | 5,7 ± 0,8    |

**Table S3.** Antibacterial activity of the ECnx-P4 as relative killing percentage (%), according to ISO standard.

|                             | E. Coli<br>(24 h)<br>% |
|-----------------------------|------------------------|
| EC0-P4                      | 0                      |
| EC1a-P4                     | 100                    |
| EC1b-P4                     | 95                     |
| EC1c-P4                     | 68                     |
| EC2a-P4                     | 100                    |
| EC2b-P4                     | 84                     |
| EC2c-P4                     | 35                     |
| EC3a-P4                     | 100                    |
| EC3b-P4                     | 100                    |
| EC3c-P4                     | 39                     |
| EC4a-P4                     | 100                    |
| EC4b-P4                     | 74                     |
| EC4c-P4                     | 26                     |
| EC-(AgNO <sub>3</sub> )a-P4 | 100                    |
| EC-(AgNO <sub>3</sub> )b-P4 | 100                    |
| EC-(AgNO <sub>3</sub> )c-P4 | 71                     |

**Table S4.** Antibacterial activity of the ECnx as relative killing percentage (%), according to ISO standard.

|                               | <b>E. Coli<br/>(24 h)<br/>%</b> |
|-------------------------------|---------------------------------|
| <b>EC0</b>                    | 0                               |
| <b>EC1a</b>                   | 100                             |
| <b>EC1b</b>                   | 87                              |
| <b>EC1c</b>                   | 59                              |
| <b>EC2a</b>                   | 100                             |
| <b>EC2b</b>                   | 75                              |
| <b>EC2c</b>                   | 5                               |
| <b>EC3a</b>                   | 100                             |
| <b>EC3b</b>                   | 70                              |
| <b>EC3c</b>                   | 18                              |
| <b>EC4a</b>                   | 100                             |
| <b>EC4b</b>                   | 99                              |
| <b>EC4c</b>                   | 28                              |
| <b>EC-(AgNO<sub>3</sub>)a</b> | 100                             |
| <b>EC-(AgNO<sub>3</sub>)b</b> | 100                             |
| <b>EC-(AgNO<sub>3</sub>)c</b> | 65                              |

**Table S4** Specific Ag(I) migration from EC<sub>n</sub>-P4 square films, expressed in mg L<sup>-1</sup> release in several simulants by heating at 70 °C for 2 hours. Data represent mean of least three independent measurements.

| Sample                      | Simulant A | Simulant B | Simulant C |
|-----------------------------|------------|------------|------------|
| EC0-P4                      | 0          | 0          | 0          |
| EC1a-P4                     | 0.121      | 2.552      | 0.681      |
| EC1b-P4                     | LOQ        | LOQ        | LOQ        |
| EC1c-P4                     | LOQ        | LOQ        | LOQ        |
| EC2a-P4                     | 0.140      | 0.042      | 0.182      |
| EC2b-P4                     | LOQ        | LOQ        | 0.028      |
| EC2c-P4                     | LOQ        | LOQ        | LOQ        |
| EC3a-P4                     | 0.891      | 1.052      | 1.961      |
| EC3b-P4                     | 0.072      | 0.092      | 0.121      |
| EC3c-P4                     | 0.042      | 0.071      | 0.082      |
| EC4a-P4                     | 0.912      | 0.751      | 1.971      |
| EC4b-P4                     | 0.061      | 0.071      | 0.052      |
| EC4c-P4                     | LOQ        | LOQ        | LOQ        |
| EC-(AgNO <sub>3</sub> )a-P4 | 0.581      | 0.791      | 0.841      |
| EC-(AgNO <sub>3</sub> )b-P4 | 0.092      | 0.062      | 0.052      |
| EC-(AgNO <sub>3</sub> )c-P4 | 0.039      | 0.032      | 0.015      |



**Table S5.** Specific Ag(I) migration from ECnx square films, expressed in mg L<sup>-1</sup> release in several simulants by heating at 70 °C for 2 hours. Data represent mean of least three independent measurements.

| Sample                   | Simulant A | Simulant B | Simulant C |
|--------------------------|------------|------------|------------|
| EC-0                     | 0          | 0          | 0          |
| EC-1a                    | 0.160      | 3.950      | 0.408      |
| EC-1b                    | LOQ        | 0.027      | 0.031      |
| EC-1c                    | LOQ        | 0.016      | 0.017      |
| EC-2a                    | 0.240      | 1.012      | 0.253      |
| EC-2b                    | 0.031      | LOQ        | 0.039      |
| EC-2c                    | LOQ        | LOQ        | LOQ        |
| EC-3a                    | 1.180      | 0.047      | 2.100      |
| EC-3b                    | LOQ        | LOQ        | LOQ        |
| EC-3c                    | LOQ        | LOQ        | 0.043      |
| EC-4a                    | 0.870      | 0.476      | 1.440      |
| EC-4b                    | 0.044      | 0.039      | 0.043      |
| EC-4c                    | LOQ        | LOQ        | LOQ        |
| EC-(AgNO <sub>3</sub> )a | 0.330      | 0.186      | 0.286      |
| EC-(AgNO <sub>3</sub> )b | 0.041      | LOQ        | 0.045      |
| EC-(AgNO <sub>3</sub> )c | 0.032      | LOQ        | 0.008      |

**Table S6.** Specific Ag(I) migration from EC<sub>n</sub>-P4 square films, expressed in mg L<sup>-1</sup> release in several simulants by heating at 40 °C for 10 days. Data represent mean of least three independent measurements.

| <b>Sample</b>                   | <b>Simulant A</b> | <b>Simulant B</b> | <b>Simulant C</b> |
|---------------------------------|-------------------|-------------------|-------------------|
| <b>EC0-P4</b>                   | 0                 | 0                 | 0                 |
| <b>EC1a-P4</b>                  | 0.131             | 0.012             | 1.651             |
| <b>EC1b-P4</b>                  | LOQ               | LOQ               | LOQ               |
| <b>EC1c-P4</b>                  | LOQ               | LOQ               | LOQ               |
| <b>EC2a-P4</b>                  | 0.440             | 0.023             | 0.815             |
| <b>EC2b-P4</b>                  | LOQ               | LOQ               | LOQ               |
| <b>EC2c-P4</b>                  | LOQ               | LOQ               | LOQ               |
| <b>EC3a-P4</b>                  | 0.871             | 2.922             | 2.722             |
| <b>EC3b-P4</b>                  | 0.061             | 0.092             | 0.081             |
| <b>EC3c-P4</b>                  | 0.042             | 0.052             | 0.071             |
| <b>EC4a-P4</b>                  | 0.742             | 1.361             | 2.872             |
| <b>EC4b-P4</b>                  | 0.081             | 0.052             | 0.081             |
| <b>EC4c-P4</b>                  | 0.034             | 0.032             | 0.051             |
| <b>EC(AgNO<sub>3</sub>)a-P4</b> | 0.881             | 0.962             | 1.122             |
| <b>EC(AgNO<sub>3</sub>)b-P4</b> | 0.097             | 0.131             | 0.452             |
| <b>EC(AgNO<sub>3</sub>)c-P4</b> | 0.042             | 0.072             | 0.091             |

**Table S7.** Specific Ag(I) migration from ECnx square films, expressed in mg L<sup>-1</sup> release in several simulants by heating at 40 °C for 10 days. Data represent mean of least three independent measurements.

| Sample                   | Simulant A | Simulant B | Simulant C |
|--------------------------|------------|------------|------------|
| EC-0                     | 0          | 0          | 0          |
| EC-1a                    | 0.210      | 0.024      | 1.790      |
| EC-1b                    | LOQ        | LOQ        | LOQ        |
| EC-1c                    | LOQ        | LOQ        | LOQ        |
| EC-2a                    | 0.522      | 0.037      | 0.998      |
| EC-2b                    | 0.032      | 0.028      | 0.028      |
| EC-2c                    | LOQ        | LOQ        | LOQ        |
| EC-3a                    | 1.012      | 2.001      | 1.640      |
| EC-3b                    | 0.052      | 0.035      | 0.046      |
| EC-3c                    | LOQ        | LOQ        | LOQ        |
| EC-4a                    | 0.421      | 1.122      | 2.275      |
| EC-4b                    | 0.032      | 0.043      | 0.051      |
| EC-4c                    | LOQ        | LOQ        | LOQ        |
| EC-(AgNO <sub>3</sub> )a | 0.532      | 0.053      | 0.108      |
| EC-(AgNO <sub>3</sub> )b | 0.044      | LOQ        | 0.044      |
| EC-(AgNO <sub>3</sub> )c | 0.038      | LOQ        | 0.027      |
